# Supplementary material
Source: PubMed Central journal article supplement (PMC6593887)
Supplement: fj.201900071R.sf1.pdf [file fj.201900071R.sf1.pdf]

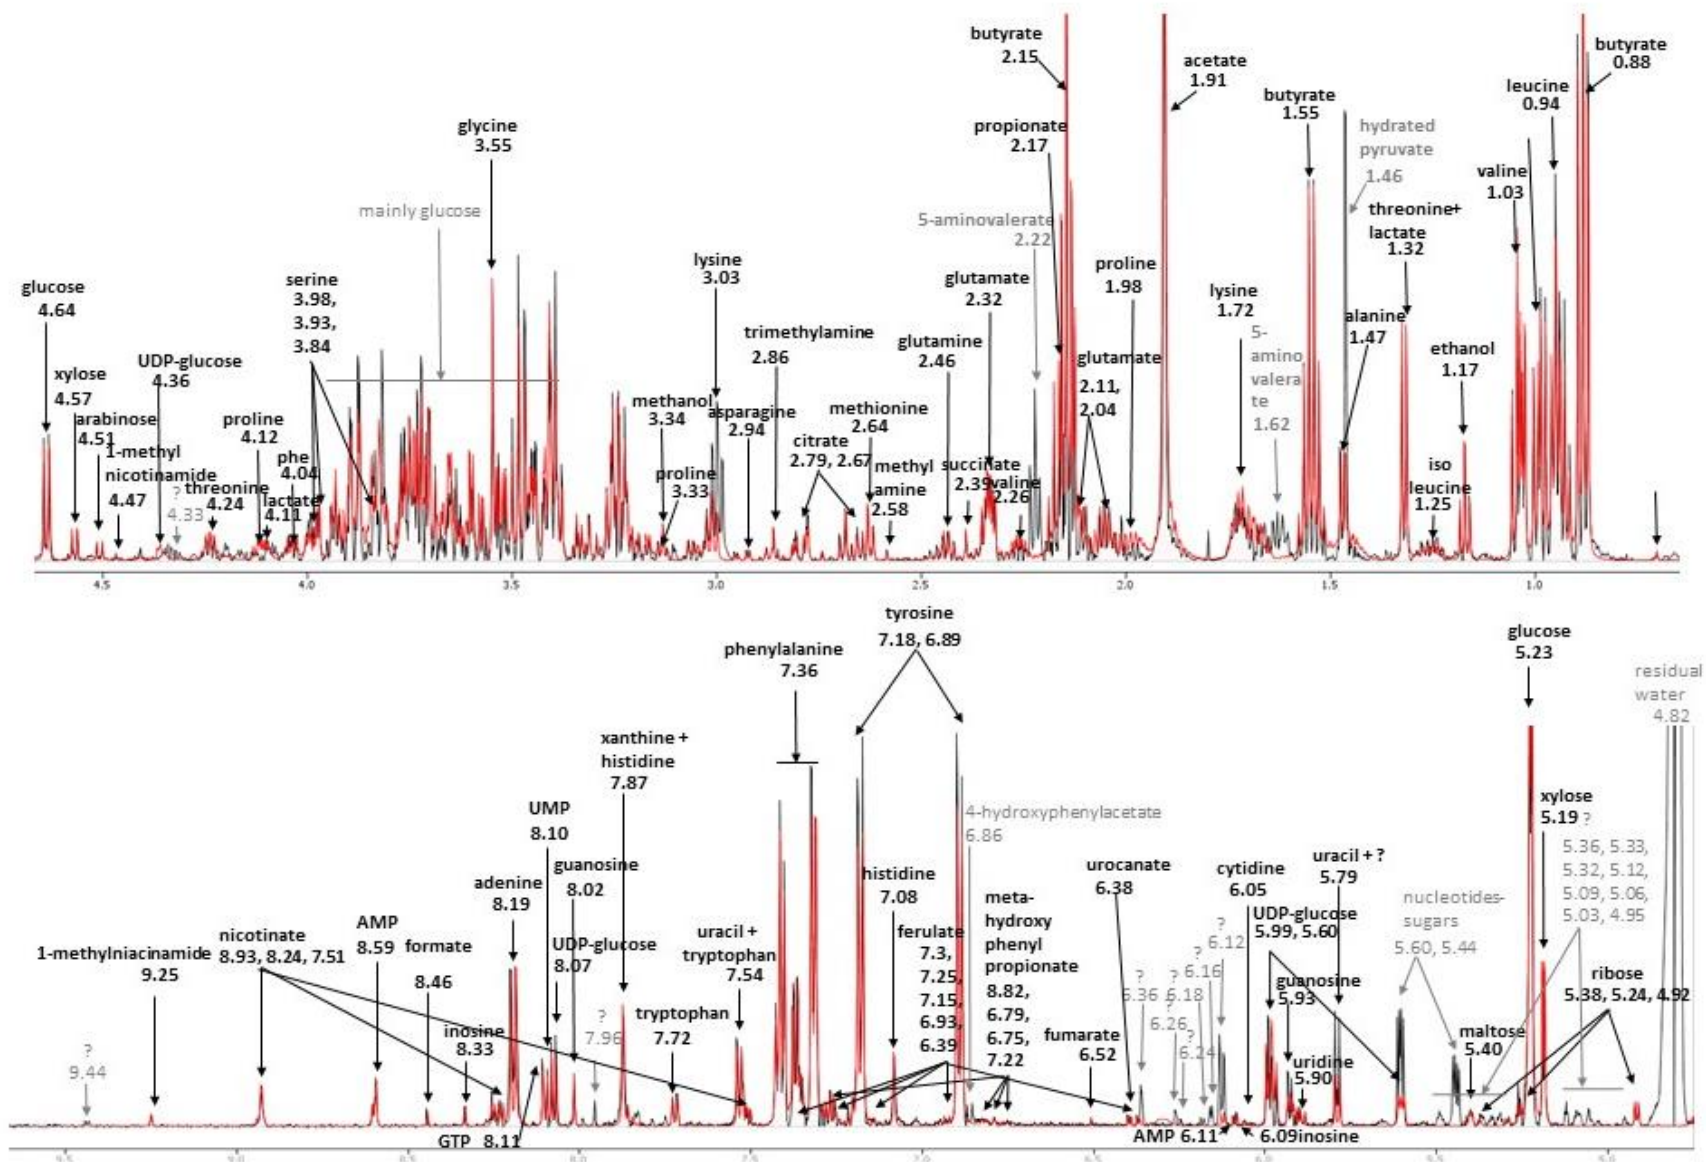

**Figure S1.** <sup>1</sup>H NMR spectra of faecal extract obtained from a murine sample at 600 MHz. The resonance signals were assigned to 63 metabolites which were identified using information found in the literature or on Human Metabolome Database website and by use of the 2D-NMR methods.
