# Supplementary material
Source: PubMed Central journal article supplement (PMC6593887)
Supplement: fj.201900071R.sf2.pdf [file fj.201900071R.sf2.pdf]

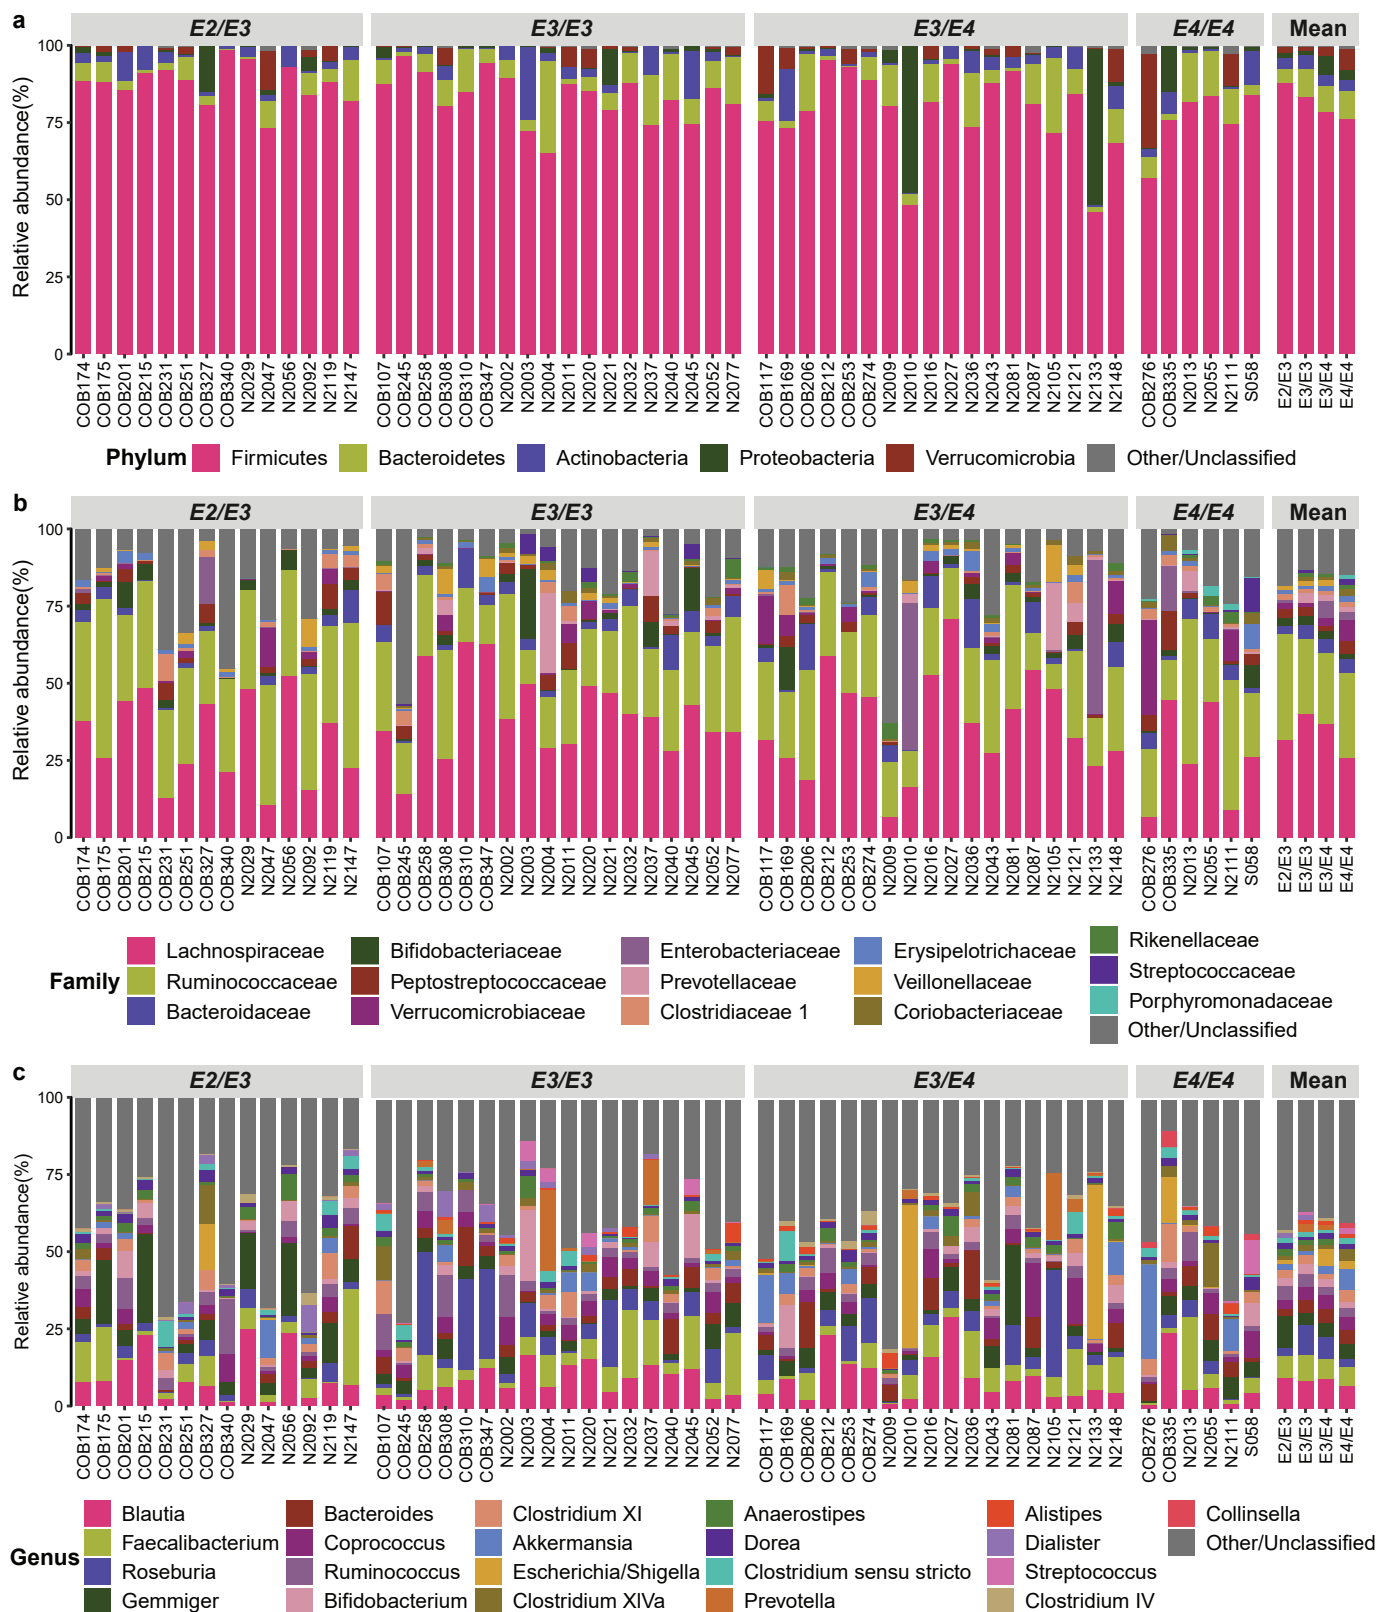

**Figure S2.** Relative abundance of human faecal microbiota taxa at (a) Phylum level, (b) Family level and (c) Genus level in subjects grouped according to *APOE* genotypes. Gut microbiota composition at phylum, family and genus levels exhibits different patterns according to human *APOE* genotype.
