# Supplementary material
Source: PubMed Central journal article supplement (PMC6593887)
Supplement: fj.201900071R.sf3.pdf [file fj.201900071R.sf3.pdf]

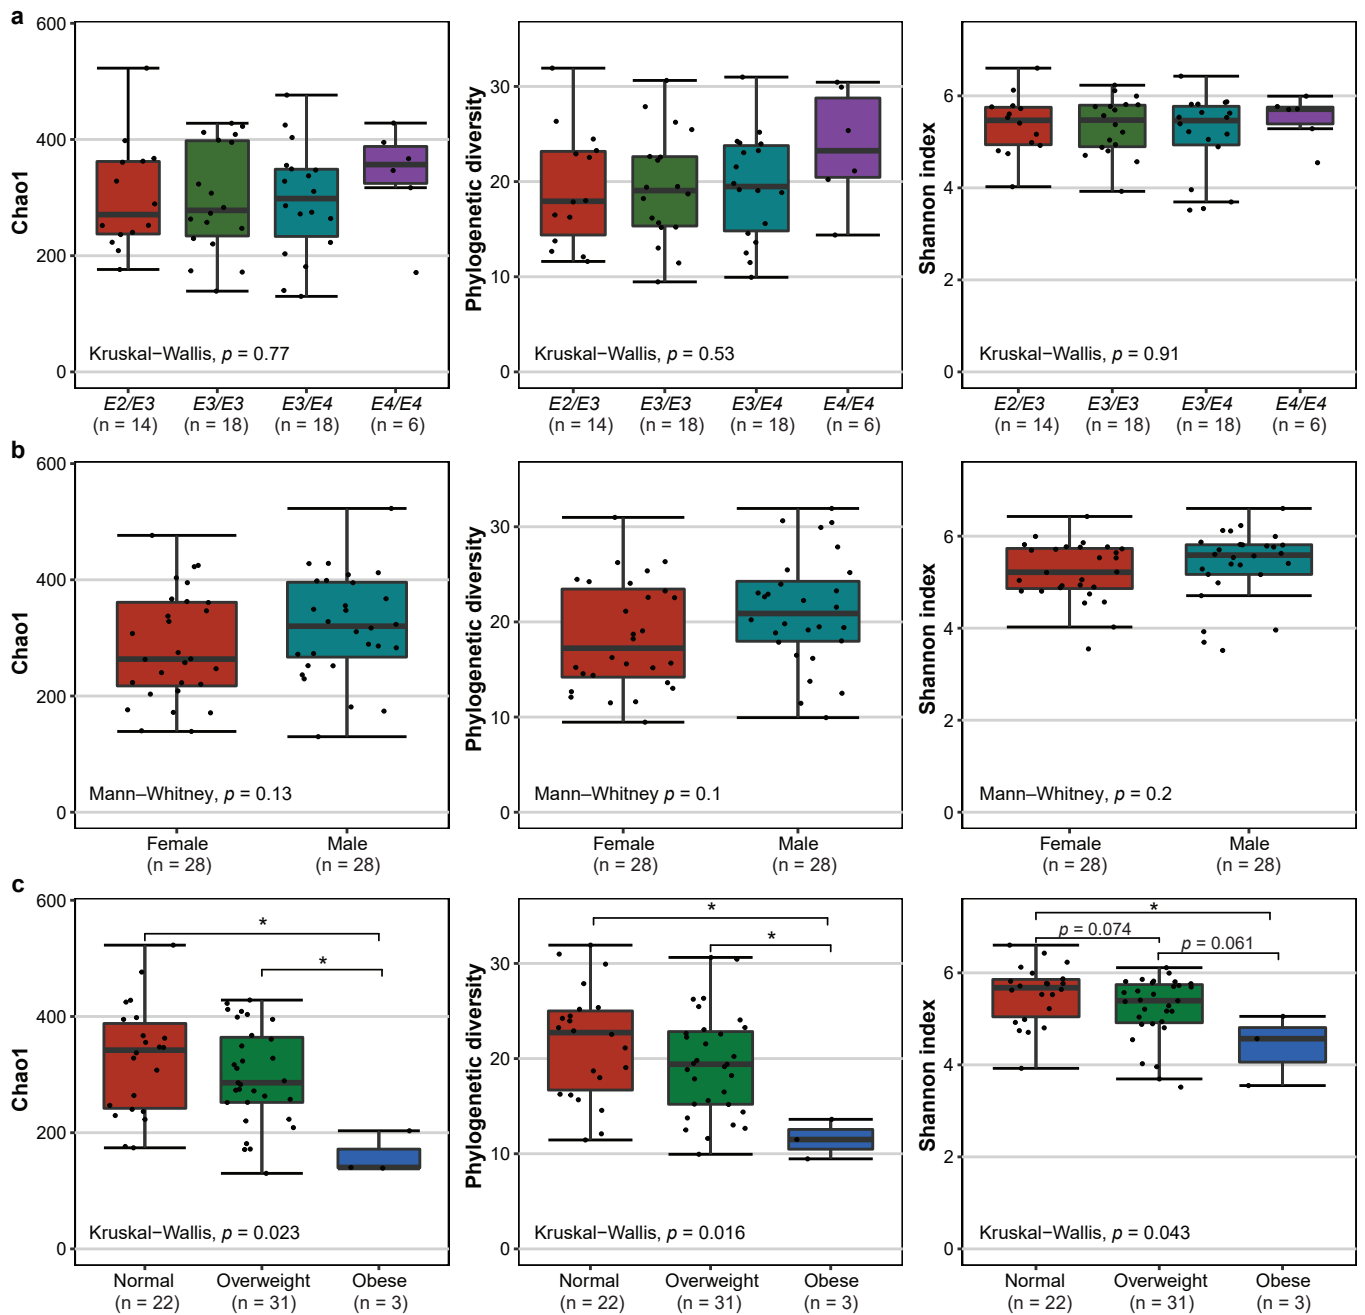

**Figure S3.** Boxplot of bacterial alpha-diversity indices for the microbiota from human faecal samples binned according to (a) *APOE* genotypes (b) sex or (c) BMI categories. No significant difference in alpha diversity was found between *APOE* genotypes or between males and females, whereas the microbiota alpha diversity of obese subjects was significantly lower than that of normal weight or overweight subjects. *P*-values were calculated by Mann-Whitney U test or Kruskal-Wallis H test followed by Dunn's multiple comparisons adjusting false discovery rate using the Benjamini-Hochberg correction. \* $p < 0.05$ .
