# Supplementary material
Source: PubMed Central journal article supplement (PMC6593887)
Supplement: fj.201900071R.sf5.pdf [file fj.201900071R.sf5.pdf]

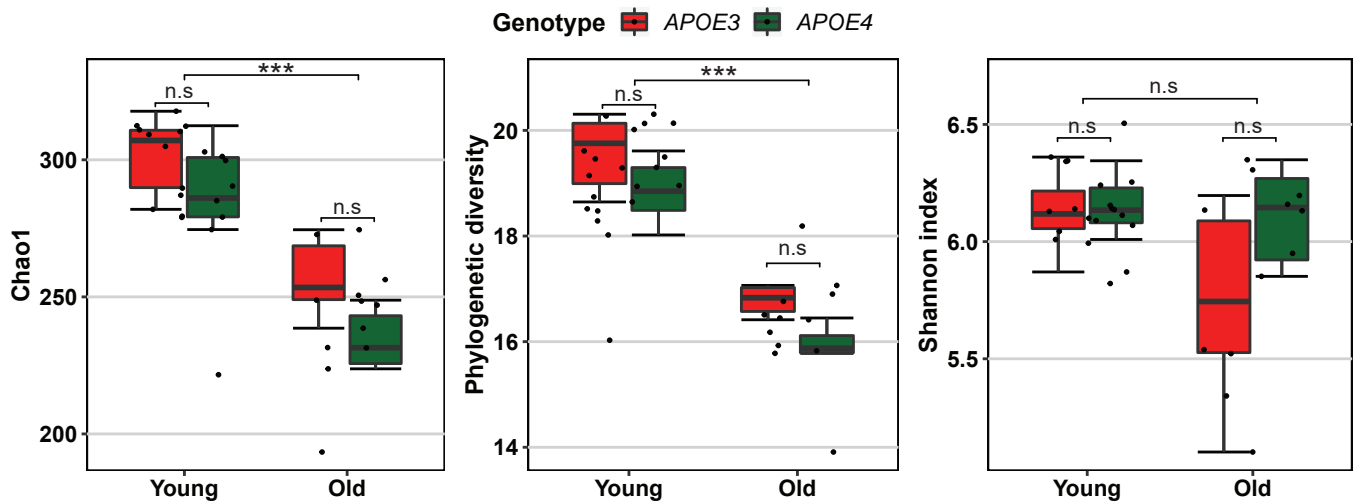

**Figure S5.** Boxplot of bacterial alpha-diversity indices for the faecal microbiota from mice grouped according to *APOE* genotype and age. No significant difference in alpha diversity between *APOE3* and *APOE4* genotypes was observed in transgenic mice, but both chao1 and phylogenetic diversity were much higher in young mice compared to old mice. *P*-value was calculated by Mann–Whitney U test for two *APOE* genotypes or two age groups. \*\*\**p* < 0.001; n.s, not significant.
