# Supplementary material
Source: PubMed Central journal article supplement (PMC6593887)
Supplement: fj.201900071R.sf6.pdf [file fj.201900071R.sf6.pdf]

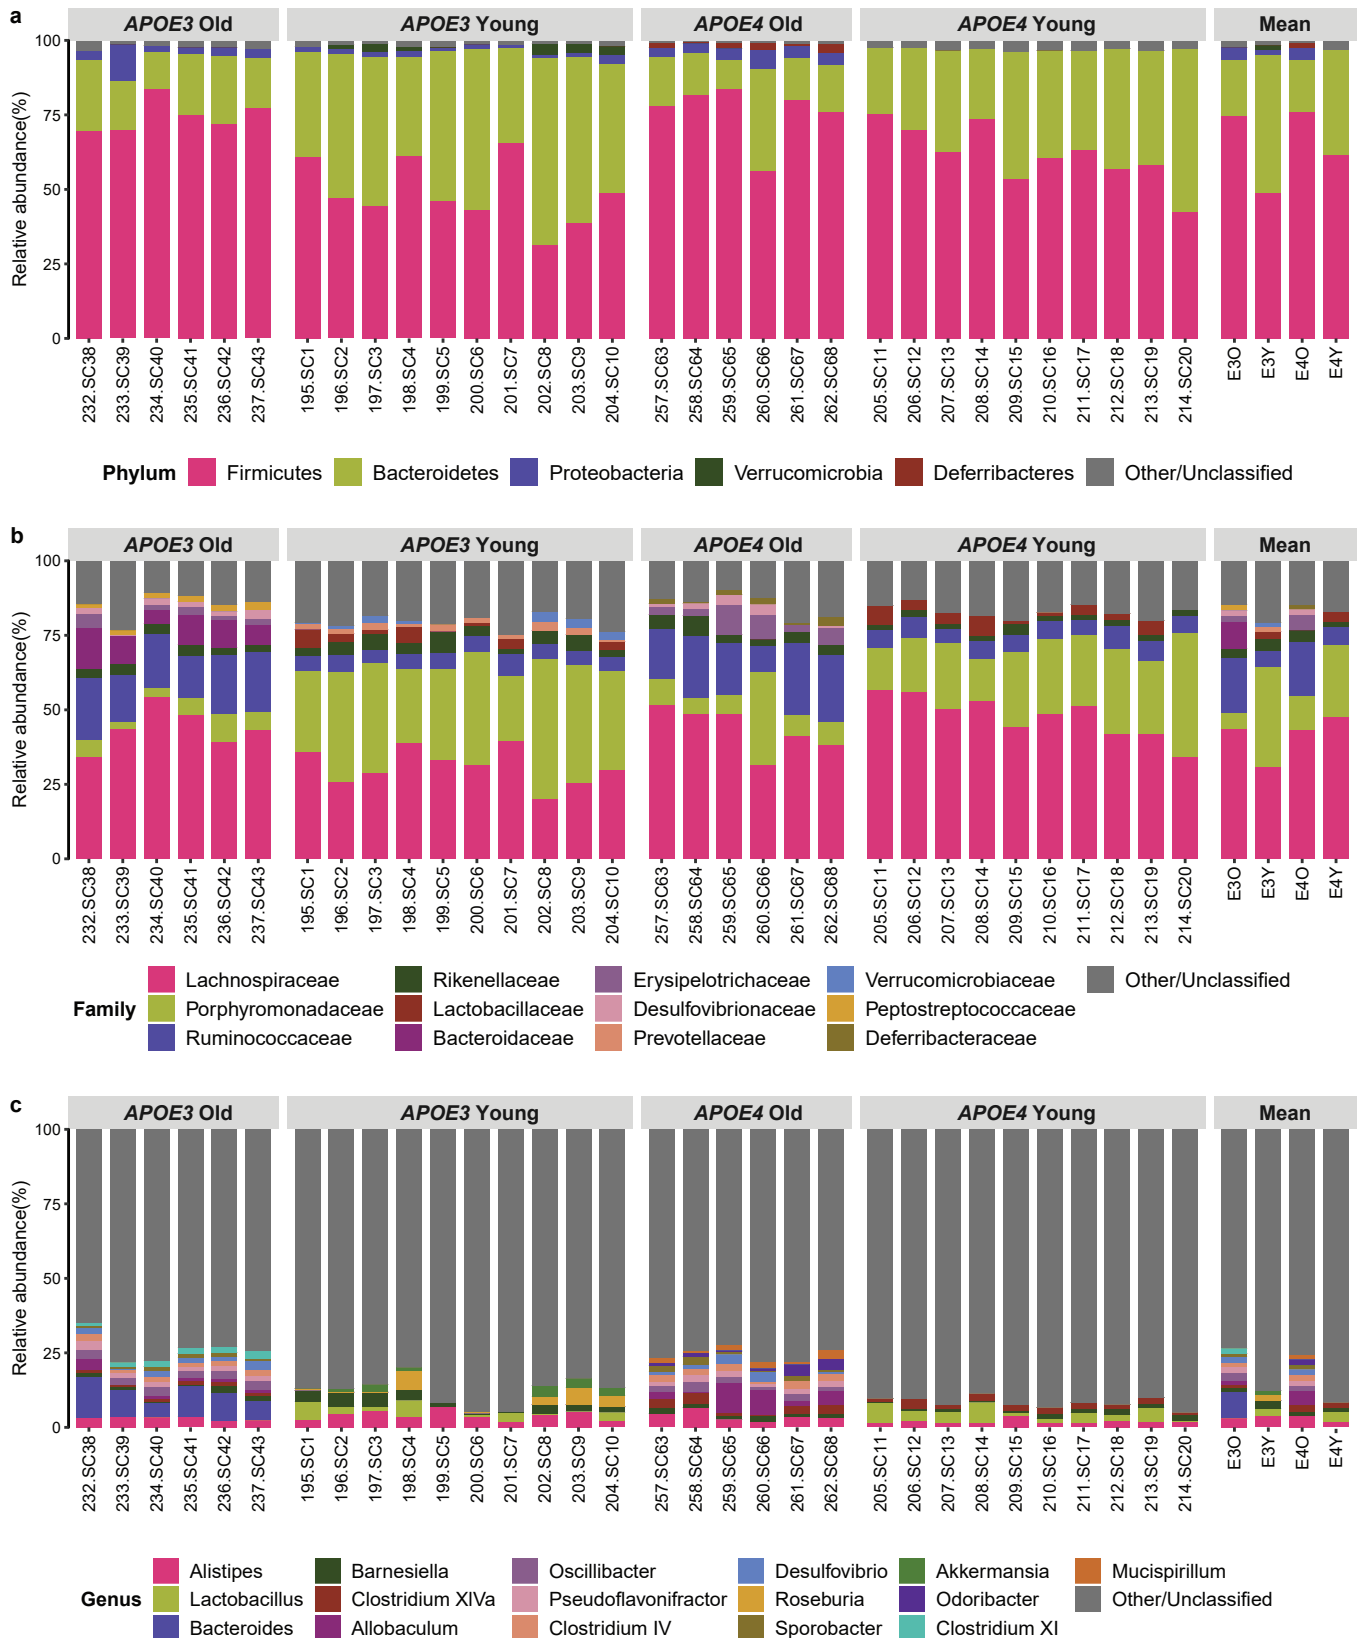

**Figure S6.** Relative abundance of mouse faecal microbiota taxa at (a) Phylum level, (b) Family level and (c) Genus level in different subjects grouped according to *APOE* genotypes and age. Gut microbial composition at phylum, family and genus levels exhibits different patterns according to *APOE* genotypes and age in transgenic mice.
