# Supplementary material
Source: PubMed Central journal article supplement (PMC6593887)
Supplement: fj.201900071R.sf8.pdf [file fj.201900071R.sf8.pdf]

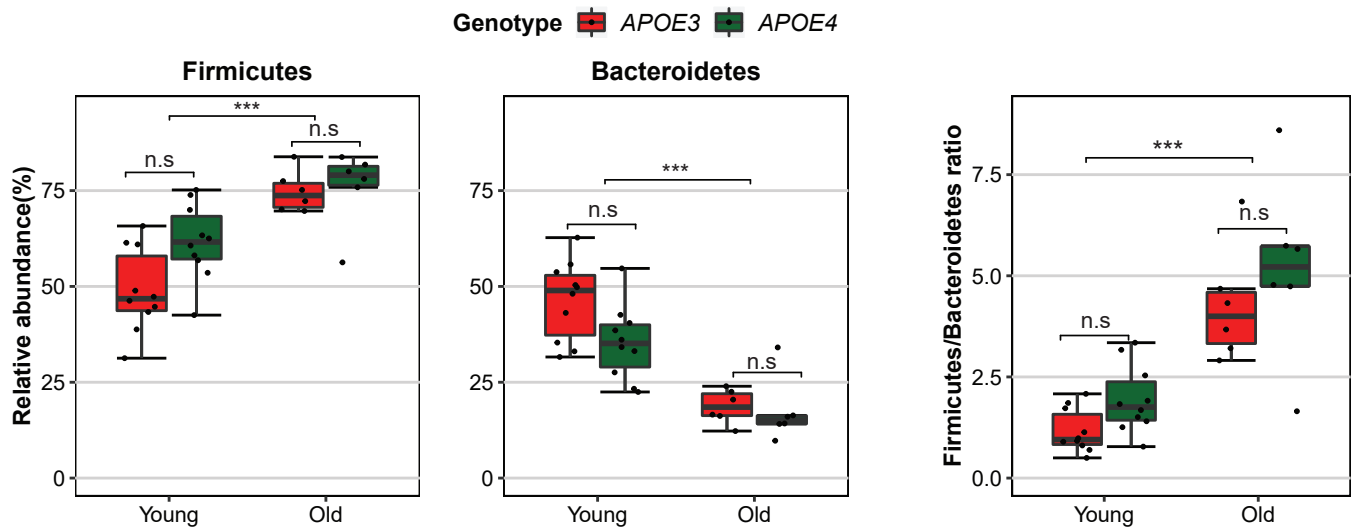

**Figure S8.** Box plot of the relative abundance from murine faecal samples of Firmicutes, Bacteroidetes and Firmicutes/Bacteroidetes ratio according to age and *APOE* genotypes. The Firmicutes/Bacteroidetes ratio was higher in old mice than young mice. *P*-values were calculated by Mann–Whitney U test for testing the significant difference between *APOE* genotype groups or age groups, \*\*\**p* < 0.001; n.s, not significant.
