# Supplementary material
Source: PubMed Central journal article supplement (PMC6593887)
Supplement: fj.201900071R.sf9.pdf [file fj.201900071R.sf9.pdf]

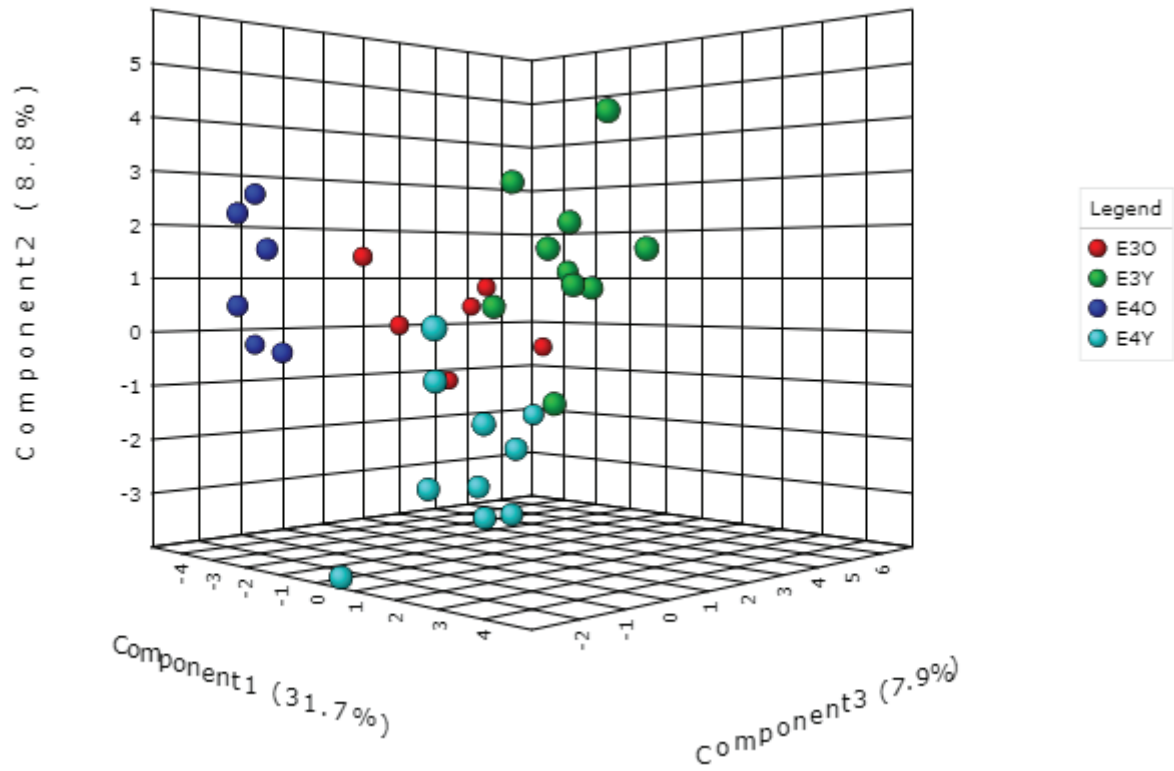

**Figure S9.** Sparse PLS Discriminant Analysis (sPLS-DA) shows a trend for microbiota separation according to age and *APOE* genotype. E3Y, *APOE3* young mice; E4Y, *APOE4* young mice; E3O, *APOE3* old mice; E4O, *APOE4* old mice.
