# Supplementary material
Source: PubMed Central journal article supplement (PMC6593887)
Supplement: fj.201900071R.sf10.pdf [file fj.201900071R.sf10.pdf]

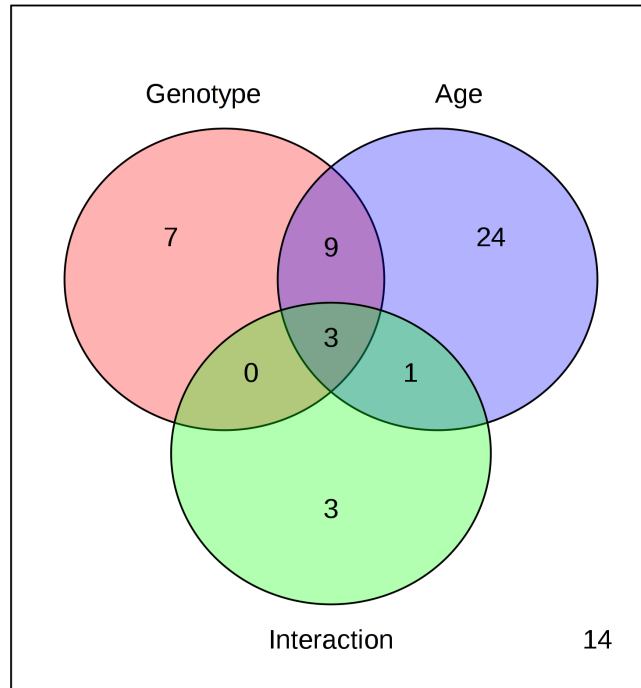

**Figure S10.** Venn diagram summary of statistically significant metabolites according to *APOE* genotype and age were conducted by two-way ANOVA with False Discovery Rate (FDR) correction. A total of 39 and 19 metabolites were significantly different in age groups and *APOE* genotype groups respectively.
